# Supplementary material for: Combining halogen bonding and chirality in a two-dimensional organic metal (EDT-TTF-I2)2(D-camphorsulfonate)·H2O
Source: Royal Society of Chemistry journal article supplement (doi:10.1039/c0cc00175a), 2010-01-01
Supplement: c0cc00175a.pdf [file c0cc00175a.pdf]

# Combining Halogen Bonding and Chirality in a Two-Dimensional Organic Metal (EDT-TTF-I<sub>2</sub>)<sub>2</sub>(*D*-Camphorsulfonate)•H<sub>2</sub>O<sup>†</sup>

Mariya Brezgunova,<sup>a</sup> Kyung-Soon Shin,<sup>a</sup> Pascale Auban-Senzier,<sup>b</sup> Olivier Jeannin<sup>a</sup> and Marc Fourmigué<sup>\*,a</sup>

5

## Supplementary Material

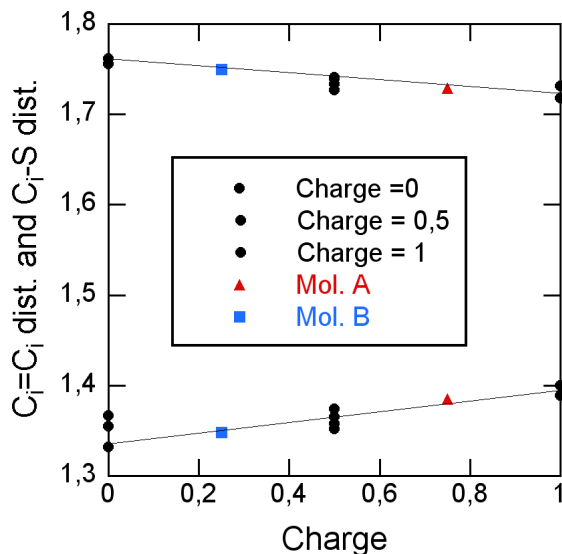

**Fig. S1** Evolution of the C<sub>i</sub>=C<sub>i</sub> and C<sub>i</sub>-S bond distances within EDT-TTFI<sub>2</sub> molecules in different salts and values for molecules A and B in salt I. The solid line is only a guide to the eye

10

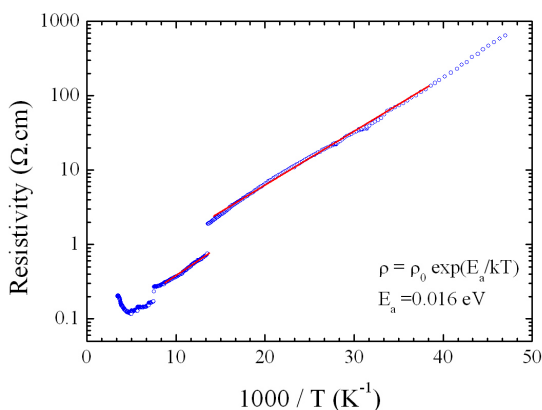

**Fig. S2** Resistivity vs. 1000/T for compound I.
